# Supplementary material for: Cyclophilin–CD147 interaction enables SARS-CoV-2 infection of human monocytes and their activation via Toll-like receptors 7 and 8
Source: Frontiers journal article supplement (doi:10.3389/fimmu.2025.1460089), 2025-02-03
Supplement: Data_Sheet_1.pdf [file Data_Sheet_1.pdf]

## *Supplementary Material*

### ***Cyclophilin–CD147 interaction enables SARS-CoV-2 infection of human monocytes and their activation via Toll-like receptors 7 and 8***

Gabor Tajti<sup>#</sup>, Laura Gebetsberger<sup>#</sup>, Gregor Pamitschka, Katharina Aigner-Radakovics, Judith Leitner, Peter Steinberger, Hannes Stockinger and Anna Ohradanova-Repic<sup>\*</sup>

<sup>#</sup> Contributed equally

<sup>\*</sup> Correspondence: [anna.repic@meduniwien.ac.at](mailto:anna.repic@meduniwien.ac.at)

# 1 Supplementary Figures and Tables

**Table S1. Detailed list of reagents used in the study**

| Reagent type | Designation                                                        | Source or reference | Catalog number   | Additional information         |
|--------------|--------------------------------------------------------------------|---------------------|------------------|--------------------------------|
| Antibody     | PE-Cy7-conjugated CD3 mouse mAb (clone UCHT1)                      | BioLegend           | 300420           |                                |
| Antibody     | Brilliant Violet 750-conjugated CD4 mouse mAb (clone SK3)          | BioLegend           | 344644           |                                |
| Antibody     | PerCP-conjugated CD8 mouse mAb (clone SK1)                         | BioLegend           | 344708           |                                |
| Antibody     | Brilliant Violet 421-conjugated CD14 mouse mAb (clone M5E2)        | BioLegend           | 301830           |                                |
| Antibody     | PerCP-Cy5.5-conjugated CD16 mouse mAb (clone 3G8)                  | BioLegend           | 302028           |                                |
| Antibody     | Brilliant Violet 605-conjugated CD19 mouse mAb (clone HIB19)       | BioLegend           | 302244           |                                |
| Antibody     | PE-conjugated CD56 mouse mAb (clone 5.1H11)                        | BioLegend           | 362508           |                                |
| Antibody     | Alexa Fluor 647-conjugated anti-human TLR2 mAb (clone TL2.1)       | BioLegend           | 309714           |                                |
| Antibody     | Alexa Fluor 488-conjugated anti-LAMP-1 mouse mAb (clone H4A3)      | BioLegend           | 328610           |                                |
| Antibody     | Brilliant Ultraviolet 805-conjugated CD14 mouse mAb (clone M5E2)   | BD Biosciences      | 612902           |                                |
| Antibody     | Anti-SARS-CoV-2 N protein rabbit mAb (clone #019)                  | SinoBiological      | 40143-R019       |                                |
| Antibody     | Anti-SARS-CoV-2 N protein recombinant chimeric mAb (clone mBG17)   | Absolute Antibody   | Ab02382-23.0     | Mouse IgG1 Fab, rabbit IgG1 Fc |
| Antibody     | Anti-dsRNA mouse mAb (clone J2)                                    | Jena Bioscience     | RNT-SCI-10010200 |                                |
| Antibody     | Alexa Fluor 647-conjugated goat anti-mouse IgG (H+L) secondary Ab  | Invitrogen          | A-21236          |                                |
| Antibody     | Alexa Fluor 647-conjugated goat anti-rabbit IgG (H+L) secondary Ab | Invitrogen          | A-21245          |                                |
| Antibody     | HRP-conjugated mouse anti-human IgG Fc mAb (clone 50B4A9)          | GeneScript          | A01854           |                                |
| Antibody     | Anti-Cyclophilin A rabbit polyclonal Ab (C1C3)                     | GeneTex             | GTX104698        |                                |

|                         |                                                                                       |                                                                                                                     |             |
|-------------------------|---------------------------------------------------------------------------------------|---------------------------------------------------------------------------------------------------------------------|-------------|
| Antibody                | Anti-Cyclophilin B rabbit polyclonal Ab                                               | Invitrogen                                                                                                          | PA1-027A    |
| Antibody                | Anti-SARS-CoV-2 S protein mouse mAb (clone #42)                                       | SinoBiological                                                                                                      | 40591-MM42  |
| Antibody                | Anti-SARS-CoV-2 N protein mouse mAb (clone #05)                                       | SinoBiological                                                                                                      | 40143-MM05  |
| Antibody                | Functional grade anti-human/mouse TLR2 recombinant human Ab, REAfinity (clone REA109) | Miltenyi Biotec                                                                                                     | 130-098-855 |
| Antibody                | REA control recombinant human Ab, REAfinity (clone REA293)                            | Miltenyi Biotec                                                                                                     | 130-129-977 |
| Antibody                | CD147 mouse anti-human mAb (clone MEM-M6/6)                                           | Kind gift from Prof. V. Horejssi, Institute of Molecular Genetics of the Czech Academy of Sciences, Prague, Czechia | N.A.        |
| Antibody                | CD147 mouse anti-human mAb (clone MEM-M6/7)                                           | Kind gift from Prof. V. Horejssi                                                                                    | N.A.        |
| Antibody                | CD8 mouse anti-human mAb (clone MEM-87)                                               | Kind gift from Prof. V. Horejssi                                                                                    | N.A.        |
| Antibody                | CD16 mouse anti-human mAb (clone MEM-154)                                             | Kind gift from Prof. V. Horejssi                                                                                    | N.A.        |
| Antibody                | CD19 mouse anti-human mAb (clone WIN-19)                                              | Kind gift from Prof. V. Horejssi                                                                                    | N.A.        |
| Antibody                | CD20 mouse anti-human mAb (clone MEM-97)                                              | Kind gift from Prof. V. Horejssi                                                                                    | N.A.        |
| Antibody                | CD56 mouse anti-human mAb (clone MEM-188)                                             | Kind gift from Prof. V. Horejssi                                                                                    | N.A.        |
| Antibody                | Isotype control mouse mAb (clone PPV06)                                               | Kind gift from Prof. V. Horejssi                                                                                    | N.A.        |
| Antibody                | CD301 mouse anti-human mAb (H037G3)                                                   | BioLegend                                                                                                           | 354702      |
| Antibody                | Ultra-LEAF™ Purified Mouse IgG2a, κ Isotype Ctrl Antibody                             | BioLegend                                                                                                           | 400264      |
| Antibody                | Alkaline phosphatase-conjugated goat anti-rabbit IgG (whole molecule) secondary Ab    | Sigma-Aldrich                                                                                                       | A3687       |
| Antibody                | Peroxidase-conjugated rabbit anti-Mouse IgG (whole molecule) secondary Ab             | Sigma-Aldrich                                                                                                       | A9044       |
| Dye                     | LIVE/DEAD™ Fixable Blue Dead Cell Stain Kit                                           | Invitrogen                                                                                                          | L23105      |
| Dye                     | 4',6-diamidino-2-phenylindole (DAPI; for DNA staining)                                | Sigma-Aldrich                                                                                                       | D5942       |
| Commercial assay or kit | Total RNA Purification Mini Spin Kit                                                  | Genaxxon                                                                                                            | S5304       |

|                         |                                                                    |                                          |             |                        |
|-------------------------|--------------------------------------------------------------------|------------------------------------------|-------------|------------------------|
| Commercial assay or kit | RNA Isolation, Total RNA Kit, peqGOLD                              | VWR                                      | 13-6834-02  |                        |
| Commercial assay or kit | M-MuLV Reverse Transcriptase                                       | New England Biolabs                      | M0253       |                        |
| Commercial assay or kit | High-Capacity cDNA Reverse Transcription Kit                       | Applied Biosystems                       | 4368814     |                        |
| Commercial assay or kit | Luna® Universal qPCR Master Mix                                    | New England Biolabs                      | M3003       |                        |
| Commercial assay or kit | Luna® Universal Probe qPCR Master Mix                              | New England Biolabs                      | M3004       |                        |
| Commercial assay or kit | CD14 MicroBeads human                                              | Miltenyi Biotec                          | 130-050-201 |                        |
| Commercial assay or kit | Anti-Mouse IgG MicroBeads                                          | Miltenyi Biotec                          | 130-048-401 |                        |
| Agonist/antagonist      | Pam3CSK4                                                           | InvivoGen                                | tlrl-pms    |                        |
| Agonist/antagonist      | FSL-1                                                              | InvivoGen                                | tlrl-fsl    |                        |
| Agonist/antagonist      | LPS Ultrapure                                                      | InvivoGen                                | tlrl-3pelps |                        |
| Agonist/antagonist      | Resiquimod (R848)                                                  | InvivoGen                                | tlrl-r848   |                        |
| Agonist/antagonist      | Enpatoran hydrochloride (M5049)                                    | MedChemExpress                           | HY-134581A  |                        |
| Protein                 | Recombinant SARS-CoV-2 S Protein RBD (carrier-free) (sRBD)         | BioLegend                                | 793606      |                        |
| Protein                 | CD147Fc                                                            | Acro Biosystems                          | CD7-H5259   |                        |
| Protein                 | ACE-2 Fc Chimera, Human                                            | GenScript                                | Z03516      |                        |
| Protein                 | Recombinant SARS-CoV-2 S protein, S1+S2 (R683A, R685A) Trimer (CF) | BioLegend                                | 795806      |                        |
| Protein                 | SARS-CoV-2 Nucleocapsid (aa1-419), His Tag Recombinant Protein     | Invitrogen                               | RP-87707    |                        |
| Protein                 | Recombinant human macrophage colony-stimulating factor (M-CSF)     | Novo-Nordisk                             |             |                        |
| Protein                 | Recombinant Cyclophilin A/PPIA Protein, Human                      | MedChemExpress                           | HY-P70047   |                        |
| Protein                 | Recombinant Cyclophilin B/PPIB Protein, Human, His-tagged          | MedChemExpress                           | HY-P70011A  |                        |
| Sequence-based reagent  | TNFf                                                               | This study, synthesized by Sigma-Aldrich | N.A.        | GCTGCACTTTGGAGTG ATCG  |
| Sequence-based reagent  | TNFr                                                               | This study, synthesized by Sigma-Aldrich | N.A.        | TCAGCTTGAGGGTTTGC TACA |

|                        |          |                                          |      |                         |
|------------------------|----------|------------------------------------------|------|-------------------------|
| Sequence-based reagent | IL1Bf    | This study, synthesized by Sigma-Aldrich | N.A. | AGCTCGCCAGTGAAATGATG    |
| Sequence-based reagent | IL1Br    | This study, synthesized by Sigma-Aldrich | N.A. | GTGGTGGTCGGAGATTCTAG    |
| Sequence-based reagent | CXCL8f   | This study, synthesized by Sigma-Aldrich | N.A. | TGGCAGCCTTCCTGATT       |
| Sequence-based reagent | CXCL8r   | This study, synthesized by Sigma-Aldrich | N.A. | TTTGGGGTGGAAAGGTTTG     |
| Sequence-based reagent | IL10f    | Ref. 52                                  | N.A. | TCCCTGTGAAAACAAGAGCAAG  |
| Sequence-based reagent | IL10r    | Ref. 52                                  | N.A. | AGTCGCCACCCTGATGTCTC    |
| Sequence-based reagent | IL6f     | This study, synthesized by Sigma-Aldrich | N.A. | TAGTGAGGAACAAGCCAGAGC   |
| Sequence-based reagent | IL6r     | This study, synthesized by Sigma-Aldrich | N.A. | TTGGGTCAGGGGTGGTTATT    |
| Sequence-based reagent | IL15f    | This study, synthesized by Sigma-Aldrich | N.A. | ACAGAAGCCAACTGGGTGAA    |
| Sequence-based reagent | IL15r    | This study, synthesized by Sigma-Aldrich | N.A. | CATCTCCGGACTCAAGTGAAAT  |
| Sequence-based reagent | EEF1A1f  | Ref. 52                                  | N.A. | GTGCTAACATGCCTTGTTTC    |
| Sequence-based reagent | EEF1A1r  | Ref. 52                                  | N.A. | AGAACACCAGTCTCCACTCG    |
| Sequence-based reagent | ACE2f    | This study, synthesized by Sigma-Aldrich | N.A. | GCAGCCACACCTAAGCATTT    |
| Sequence-based reagent | ACE2r    | This study, synthesized by Sigma-Aldrich | N.A. | GAGTGCTTGTTTGAGCAGGA    |
| Sequence-based reagent | BSGf     | This study, synthesized by Sigma-Aldrich | N.A. | GACGACCAGTGGGGAGAGTA    |
| Sequence-based reagent | BSGr     | This study, synthesized by Sigma-Aldrich | N.A. | CGTTGATGTGTTCTGACGACTTC |
| Sequence-based reagent | AGERf    | This study, synthesized by Sigma-Aldrich | N.A. | TCAGGACCAGGGAACCTACA    |
| Sequence-based reagent | AGERr    | This study, synthesized by Sigma-Aldrich | N.A. | CAGGGCCAGGGCTAGAGT      |
| Sequence-based reagent | ASGR1f   | This study, synthesized by Sigma-Aldrich | N.A. | GGAGGCAATGTGGGAAGAA     |
| Sequence-based reagent | ASGR1r   | This study, synthesized by Sigma-Aldrich | N.A. | CAGACACGAACTGCTTCACG    |
| Sequence-based reagent | CD209f   | This study, synthesized by Sigma-Aldrich | N.A. | CTTCACCTGGATGGGACTTTC   |
| Sequence-based reagent | CD209r   | This study, synthesized by Sigma-Aldrich | N.A. | GGGCTCTCCTCTGTTCCAATA   |
| Sequence-based reagent | CLEC10Af | This study, synthesized by Sigma-Aldrich | N.A. | GCTGGTCATCATCTGTGTGGT   |

|                        |                    |                                          |      |                                     |
|------------------------|--------------------|------------------------------------------|------|-------------------------------------|
| Sequence-based reagent | CLEC10Ar           | This study, synthesized by Sigma-Aldrich | N.A. | GATCTCCGCCACAGTG TTTG               |
| Sequence-based reagent | CLEC4Gf            | This study, synthesized by Sigma-Aldrich | N.A. | GTTACTGGCTGGGCCT GAG                |
| Sequence-based reagent | CLEC4Gr            | This study, synthesized by Sigma-Aldrich | N.A. | AGCGTCATTGGGCTCTC C                 |
| Sequence-based reagent | CLEC4Mf            | This study, synthesized by Sigma-Aldrich | N.A. | AGCAGCAGCAAATCTA TCAAGAAC           |
| Sequence-based reagent | CLEC4Mr            | This study, synthesized by Sigma-Aldrich | N.A. | AGTTCCGCTGGGAGTT AGACA              |
| Sequence-based reagent | HSPA5f             | This study, synthesized by Sigma-Aldrich | N.A. | AACCGCTGAGGCTTAT TTGG               |
| Sequence-based reagent | HSPA5r             | This study, synthesized by Sigma-Aldrich | N.A. | AGTTCCAGCGTCTTTGG TTG               |
| Sequence-based reagent | KREMEN1f           | This study, synthesized by Sigma-Aldrich | N.A. | TCAGACTGTCCCAGGT AGCAAT             |
| Sequence-based reagent | KREMEN1r           | This study, synthesized by Sigma-Aldrich | N.A. | GGATGAGGAGAGTTGC CAGAC              |
| Sequence-based reagent | NRP1f              | This study, synthesized by Sigma-Aldrich | N.A. | ATCCTCATCGGGCATTCT                  |
| Sequence-based reagent | NRP1r              | This study, synthesized by Sigma-Aldrich | N.A. | TGCCCAGAGCTTCCAT ACAT               |
| Sequence-based reagent | TMEM106Bf          | This study, synthesized by Sigma-Aldrich | N.A. | TCGACGTGAAATACAT TGGTGT             |
| Sequence-based reagent | TMEM106Br          | This study, synthesized by Sigma-Aldrich | N.A. | TTGAACTTGGGCAGTG ATGTT              |
| Sequence-based reagent | SARS-COV-2 Nf      | Ref. 61, synthesized by Sigma-Aldrich    | N.A. | GACCCCAAAATCAGCG AAAT               |
| Sequence-based reagent | SARS-COV-2 Nr      | Ref. 61, synthesized by Sigma-Aldrich    | N.A. | TCTGGTTACTGCCAGTT GAATCTG           |
| Sequence-based reagent | SARS-COV-2 N probe | Ref. 61, synthesized by Sigma-Aldrich    | N.A. | FAM- ACCCCGCATTACGTTTG GTGGACC-BHQ1 |
| Sequence-based reagent | TLR3f              | This study, synthesized by Sigma-Aldrich | N.A. | GCGCTAAAAAGTGAAG AACTGG             |
| Sequence-based reagent | TLR3r              | This study, synthesized by Sigma-Aldrich | N.A. | CGTGAAAACACCCTGG AGAA               |
| Sequence-based reagent | TLR7f              | This study, synthesized by Sigma-Aldrich | N.A. | CTTCAACCAGACCTCTA CATTC             |
| Sequence-based reagent | TLR7r              | This study, synthesized by Sigma-Aldrich | N.A. | AAACCATCTAGCCCCAA GGA               |
| Sequence-based reagent | TLR8f              | This study, synthesized by Sigma-Aldrich | N.A. | GACCCAACTTCGATAACC TAAACC           |
| Sequence-based reagent | TLR8r              | This study, synthesized by Sigma-Aldrich | N.A. | ATGCCCCAGAGGCTATT TCT               |

|                         |                                                          |                                          |          |                                                |
|-------------------------|----------------------------------------------------------|------------------------------------------|----------|------------------------------------------------|
| Sequence-based reagent  | fTLR7f                                                   | This study, synthesized by Sigma-Aldrich | N.A.     | ACCAGACCTCTACATTC CATTG                        |
| Sequence-based reagent  | fTLR7r                                                   | This study, synthesized by Sigma-Aldrich | N.A.     | AGGGCTAGACCGTTTCC TTG                          |
| Sequence-based reagent  | fTLR8f                                                   | This study, synthesized by Sigma-Aldrich | N.A.     | TTGAAAGGGAGAATGA AGGAGTC                       |
| Sequence-based reagent  | fTLR8r                                                   | This study, synthesized by Sigma-Aldrich | N.A.     | TCATTCCCTTGCATCTTT ATTATGG                     |
| Sequence-based reagent  | NSP4-9f                                                  | This study, synthesized by Sigma-Aldrich | N.A.     | <b>CAACATGGGTGGTAAA</b><br>ATTGTTAATAATTGGTT G |
| Sequence-based reagent  | NSP4-9r                                                  | This study, synthesized by Sigma-Aldrich | N.A.     | <b>TTATTGTAGACGTACTG</b><br>TGGCAGCTA          |
| Sequence-based reagent  | Random heptamers (7N)                                    | Synthesized by Sigma-Aldrich             | N.A.     |                                                |
| Reagent                 | Heparin sodium salt from porcine intestinal mucosa       | Sigma-Aldrich                            | H3149    |                                                |
| Reagent                 | ECL™ Prime Western Blotting Detection Reagent            | Cytiva                                   | RPN2236  |                                                |
| Reagent                 | Substrate Reagent Pack for ELISA                         | R&D Systems                              | DY999    |                                                |
| Reagent                 | Penicillin-Streptomycin (10,000 U/mL)                    | Gibco/Thermo Fisher Scientific           | 15140122 |                                                |
| Reagent                 | HEPES solution 1 M, pH 7.0-7.6                           | Sigma-Aldrich                            | H0887    |                                                |
| Reagent                 | MEM non-essential amino acids solution (100X)            | Gibco/Thermo Fisher Scientific           | 11140035 |                                                |
| Reagent                 | Dimethyl sulfoxide (DMSO), cell culture grade            | PanReac AppliChem                        | A3672    |                                                |
| Reagent                 | Lymphoprep™                                              | Axis-Shield                              | 1858     |                                                |
| Reagent                 | L-Glutamine (200 mM)                                     | Gibco/Thermo Fisher Scientific           | 25030081 |                                                |
| Reagent                 | Fetal Bovine Serum (FBS) South America, Heat Inactivated | Biowest                                  | S181H    |                                                |
| Reagent                 | Deoxynucleotide (dNTP) Solution Mix                      | New England Biolabs                      | N0447    |                                                |
| Reagent                 | RNase Inhibitor, Human Placenta                          | New England Biolabs                      | M0307    |                                                |
| Reagent                 | Phusion High-Fidelity DNA Polymerase                     | New England Biolabs                      | M0530S   |                                                |
| Commercial assay or kit | Quick Blunting Kit                                       | New England Biolabs                      | E1201    |                                                |
| Commercial assay or kit | HiScribe T7 Quick High Yield RNA Synthesis Kit           | New England Biolabs                      | E2050S   |                                                |
| Commercial assay or kit | Monarch DNA Gel Extraction Kit                           | New England Biolabs                      | T1020S   |                                                |
| Commercial assay or kit | Monarch Plasmid Miniprep Kit                             | New England Biolabs                      | T1010S   |                                                |

# Supplementary Material

|         |                                                    |                                                                             |                |                                                                                                                                                  |
|---------|----------------------------------------------------|-----------------------------------------------------------------------------|----------------|--------------------------------------------------------------------------------------------------------------------------------------------------|
| Plasmid | pBluescript II KS(-) Phagemid vector               | Stratagene                                                                  | 212208         |                                                                                                                                                  |
| Plasmid | pBMN-Z                                             | Addgene                                                                     | Plasmid #1734  | A gift from Garry Nolan (Addgene plasmid # 1734; <a href="http://n2t.net/addgene:1734">http://n2t.net/addgene:1734</a> ; RRID:Addgene_1734)      |
| Plasmid | pMD_OGP (gag.pol retroviral packaging plasmid)     | kindly provided by Dr. RC Mulligan, Harvard Medical School, Boston, MA, USA | N.A.           |                                                                                                                                                  |
| Plasmid | pMD2.G (VSV-G envelope expressing plasmid)         | Addgene                                                                     | Plasmid #12259 | A gift from Didier Trono (Addgene plasmid # 12259; <a href="http://n2t.net/addgene:12259">http://n2t.net/addgene:12259</a> ; RRID:Addgene_12259) |
| Reagent | TurboFect Transfection Reagent                     | Thermo Fisher Scientific                                                    | R0531          |                                                                                                                                                  |
| Reagent | Lipofectamine 3000 Transfection Reagent            | Thermo Fisher Scientific                                                    | L3000001       |                                                                                                                                                  |
| Reagent | DEPC-treated nuclease-free water                   | Fischer Scientific                                                          | BP561-1        |                                                                                                                                                  |
| Reagent | Beriglobin® P (human immunoglobulin)               | CSL Behring                                                                 | N.A.           |                                                                                                                                                  |
| Reagent | CC/Mount™                                          | Sigma-Aldrich                                                               | C9368          |                                                                                                                                                  |
| Other   | DMEM, high glucose, GlutaMAX™ supplement, pyruvate | Gibco/Thermo Fisher Scientific                                              | 31966021       |                                                                                                                                                  |
| Other   | RPMI 1640 medium                                   | Gibco/Thermo Fisher Scientific                                              | 21875034       |                                                                                                                                                  |



**Table S2. Presence of cyclophilin A, B and D (encoded by *PPIA*, *PPIB* or *PPID*, respectively), CD147 (two isoforms, produced by alternative promoter usage from *BSG*), ACE2 or SARS-CoV-2 S and N proteins in the proteomic analysis of purified SARS-CoV-2 virions or the respective mock supernatant of the Caco-2 producer cells.** Shown data are extracted from the mass spectrometry analysis of L. Gebetsberger et al., 2024 (Ref. 62), the raw data of which were deposited in the ProteomeXchange Consortium via the PRIDE partner repository (<http://www.ebi.ac.uk/pride/archive/>) under the identifier PXD050009. n.d. not detected.

| Accession (Uniprot) | Gene               | Relative abundance in the virus preparation ( $\pm$ SEM) | Relative abundance in the mock preparation ( $\pm$ SEM) | Abundance in the virus fraction (log2 fold-change) | p value |
|---------------------|--------------------|----------------------------------------------------------|---------------------------------------------------------|----------------------------------------------------|---------|
| <b>P62937-2</b>     | <b><i>PPIA</i></b> | 128.963 ( $\pm$ 12.29)                                   | 71.037 ( $\pm$ 5.96)                                    | 0.860                                              | 0.037   |
| <b>P23284</b>       | <b><i>PPIB</i></b> | 132.889 ( $\pm$ 12.28)                                   | 67.111 ( $\pm$ 2.50)                                    | 0.986                                              | 0.039   |
| <b>Q08752</b>       | <b><i>PPID</i></b> | 139.593 ( $\pm$ 11.90)                                   | 60.407 ( $\pm$ 6.46)                                    | 1.208                                              | 0.014   |
| <b>P35613</b>       | <b><i>BSG</i></b>  | 102.594 ( $\pm$ 18.80)                                   | 97.406 ( $\pm$ 12.57)                                   | 0.075                                              | 0.854   |
| <b>P35613-3</b>     | <b><i>BSG</i></b>  | 106.153 ( $\pm$ 12.42)                                   | 93.847 ( $\pm$ 11.10)                                   | 0.178                                              | 0.558   |
| <b>Q9BYF1</b>       | <b><i>ACE2</i></b> | n. d.                                                    | n. d.                                                   |                                                    |         |
| <b>P0DTC9</b>       | <b>N</b>           | 199.907 ( $\pm$ 11.28)                                   | 0.093 ( $\pm$ 0.01)                                     | 11.075                                             | 0.004   |
| <b>P0DTC2</b>       | <b>S</b>           | 199.717 ( $\pm$ 14.49)                                   | 0.283 ( $\pm$ 0.01)                                     | 9.465                                              | 0.007   |

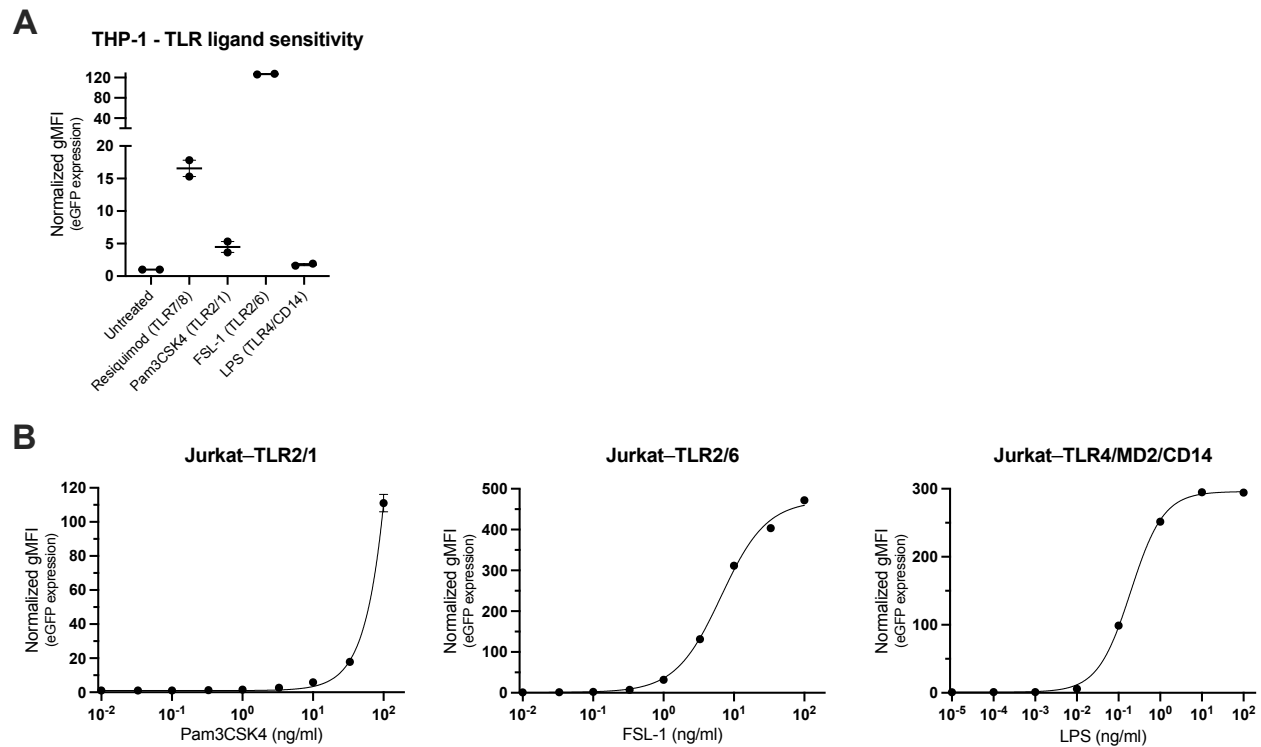

**Figure S1. Stimulation of NF- $\kappa$ B::eGFP reporter cell lines with the prototype TLR ligands shows higher sensitivity of the Jurkat reporter cells to the designated ligands than the broadly-reacting THP-1 cells. (A)** THP-1 NF- $\kappa$ B::eGFP reporter cells were left untreated or stimulated with the TLR7/8 ligand resiquimod (2.5  $\mu$ g/ml), TLR2/1 ligand Pam3CSK4 (10 ng/ml), TLR2/1 ligand FSL-1 (10 ng/ml) or TLR4 ligand LPS (10 ng/ml). **(B)** Jurkat NF- $\kappa$ B::eGFP reporter cells engineered to express the indicated set of TLRs were treated with the prototype ligands at the indicated concentrations. In each case, GFP expression was measured by flow cytometry after 24 h, and shown as fold-change of geometric mean of fluorescence intensity (gMFI). Data are shown as a scatter plot and mean  $\pm$  SEM from 2 individual experiments (A), or as dose-response curves generated with 4-parameter sigmoidal fit with mean  $\pm$  SEM (B, n = 2).

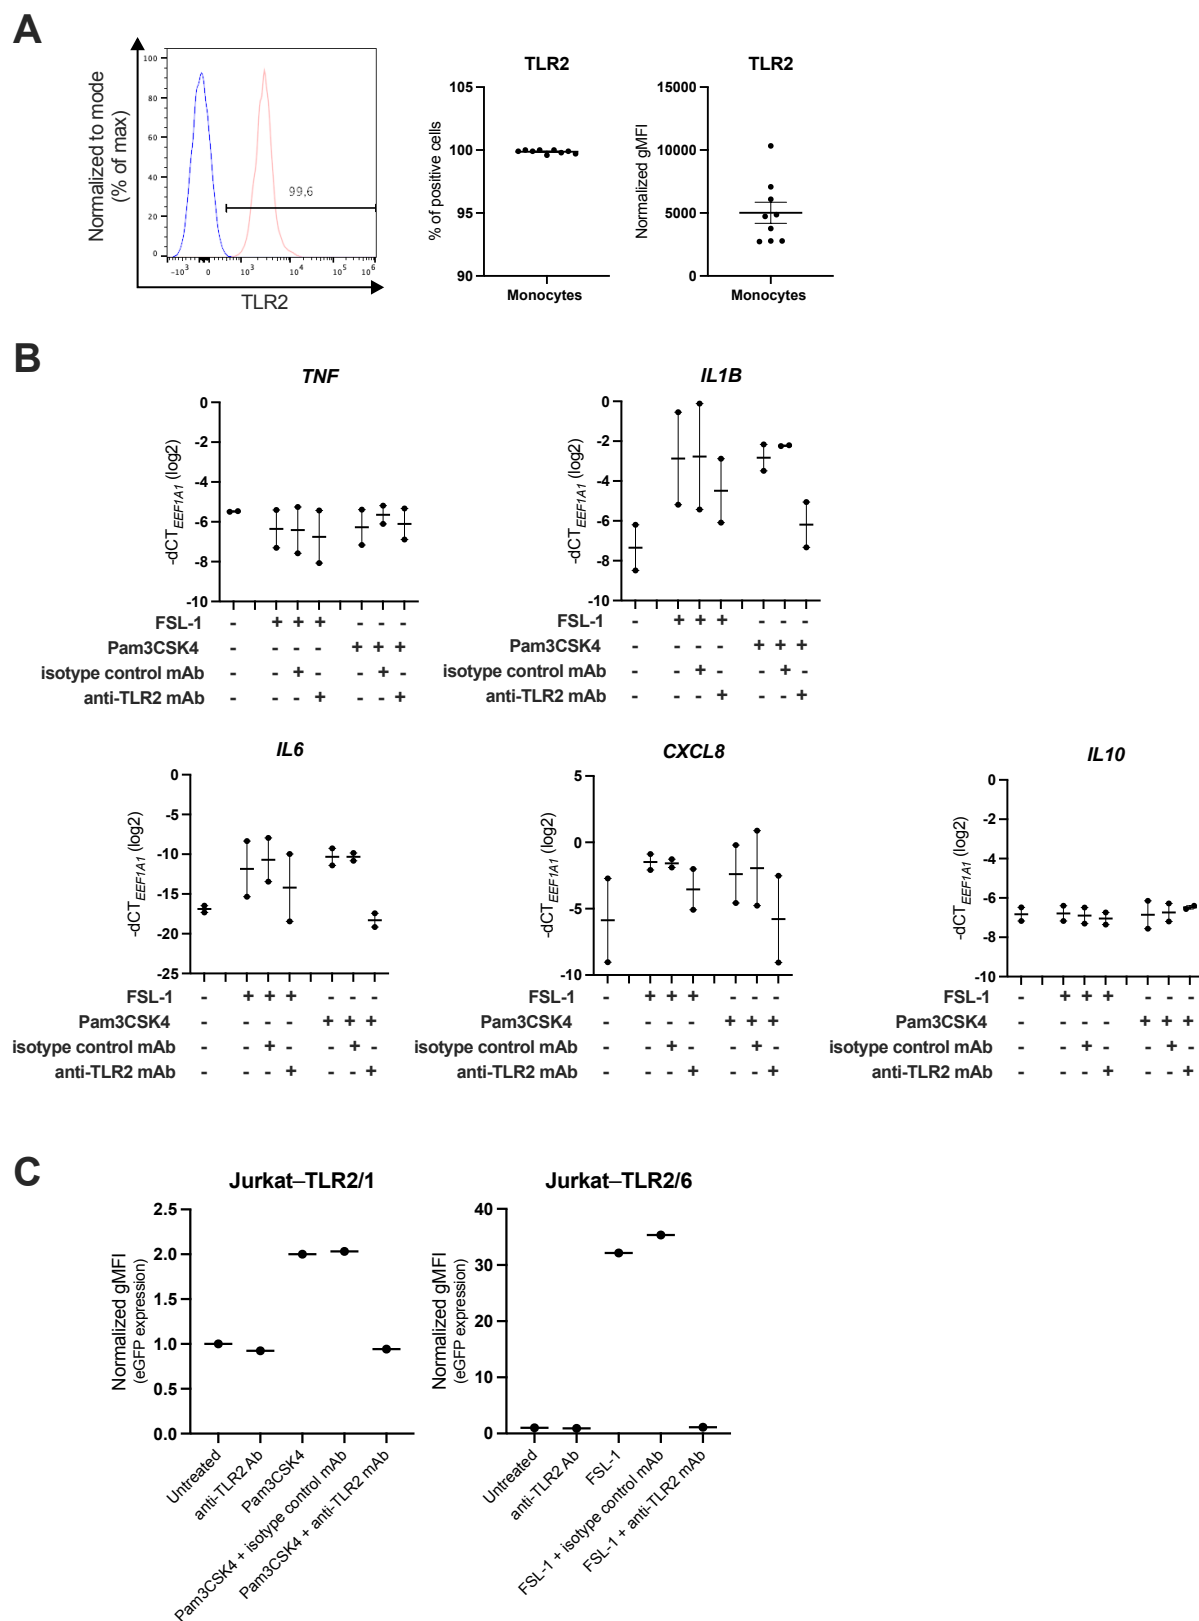

**Figure S2. The anti-TLR2 blocking antibody is functional, since it counteracts the effects of the TLR2/1 and TLR2/6 ligands in primary monocytes and Jurkat NF- $\kappa$ B::eGFP reporter cells. (A)**

TLR2 expression in primary human monocytes, gated as CD3<sup>-</sup>CD14<sup>+</sup> in PBMC samples was determined by flow cytometry. A representative experiment and pooled data of 9 donors, evaluated as percentage of TLR2<sup>+</sup> monocytes and normalized gMFI are shown as scatter plots with individual points and mean  $\pm$  SEM. **(B)** Human peripheral blood monocytes were stimulated with Pam3CSK4 (10 ng/ml, TLR2/1 agonist) or FSL-1 (10 ng/ml, TLR2/6 agonist) in the presence or absence of anti-TLR2 mAb or isotype control mAb (10  $\mu$ g/ml) for 24 h, and expression of the indicated proinflammatory cytokine genes was measured by RT-qPCR. Gene expression is relative to the *EEF1A1* housekeeping gene and is shown as a scatter plot with individual values (n = 2 donors) and mean  $\pm$  SEM. Statistical analysis was not performed. **(C)** Jurkat NF- $\kappa$ B::eGFP reporter cells overexpressing either TLR2/1 or TLR2/6 were either left untreated or treated for 24 h with the prototype ligands, the TLR2/1 agonist Pam3CSK4 (2 ng/ml), or the TLR2/6 agonist FSL-1 (2 ng/ml). In parallel, cells were pretreated with either anti-TLR2 mAb or isotype control mAb (both at 10  $\mu$ g/ml) for 30 min before addition of the agonists. eGFP expression was measured by flow cytometry after 24 h and is shown as fold-change of gMFI. Data are visualized as a scatter plot from 1 experiment.

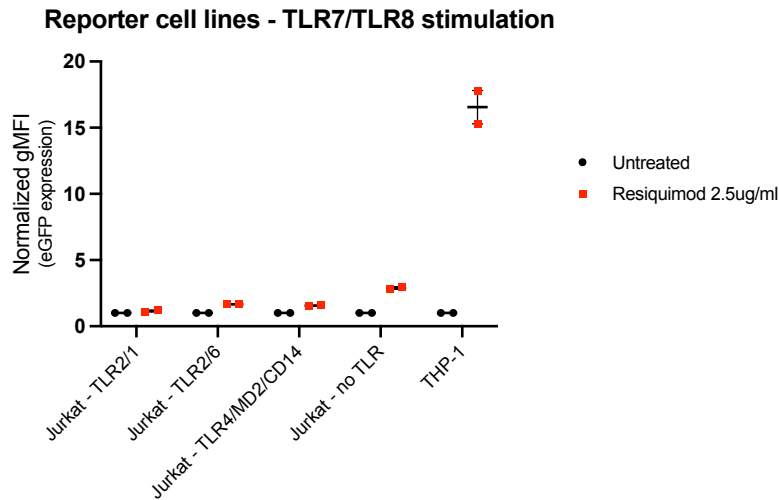

**Figure S3. THP-1 but not the Jurkat NF- $\kappa$ B::eGFP reporter cells respond to the TLR7/8 stimulation.** Jurkat NF- $\kappa$ B::eGFP reporter cells overexpressing the indicated surface TLRs (or not) as well as THP-1 NF- $\kappa$ B::eGFP reporter cells were treated (or not) with the TLR7/8 agonist resiquimod (2.5  $\mu$ g/ml) for 24 h. eGFP expression was measured by flow cytometry, and reported as fold-change of gMFI to untreated cells in scatter plots with individual values and mean  $\pm$  SEM ( $n = 2$ ).

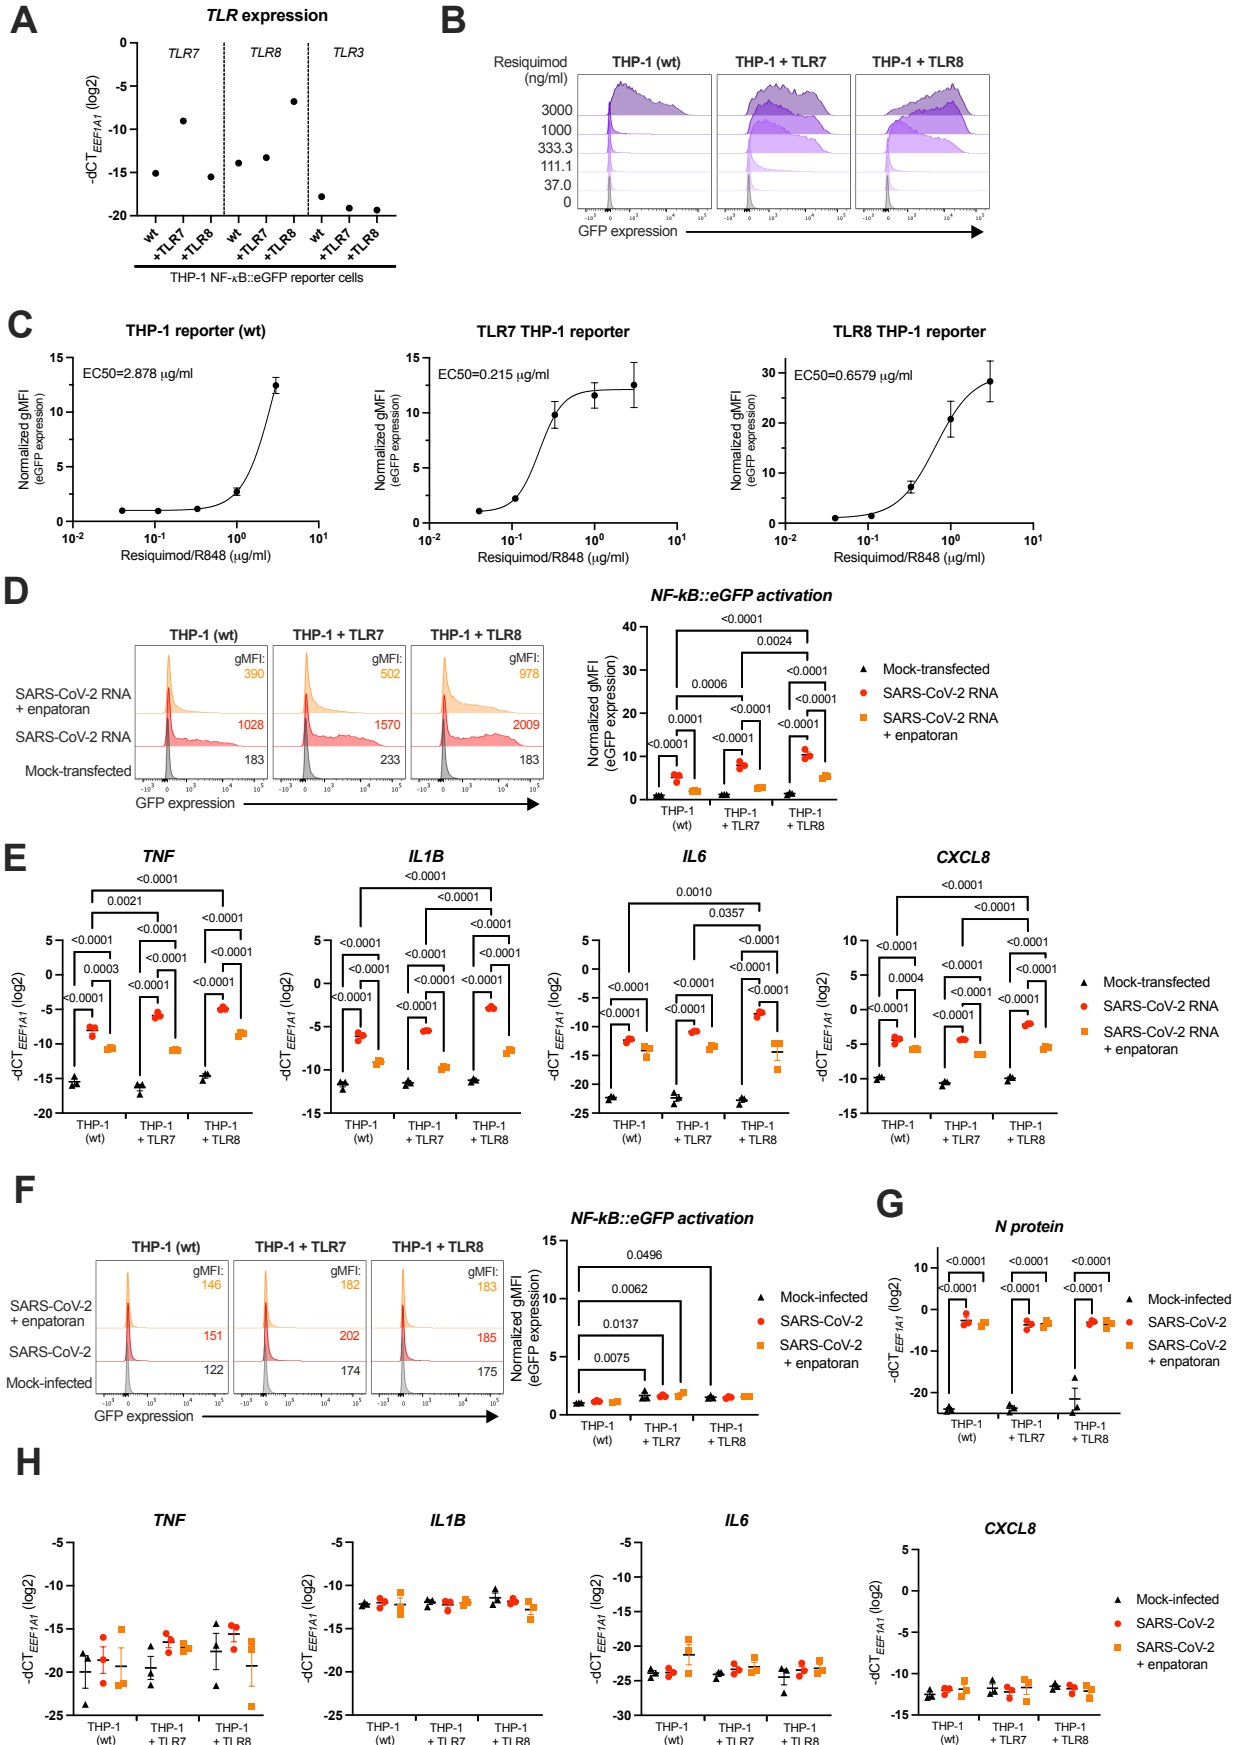

**Figure S4. Generation, characterization and stimulation of the novel TLR7 and TLR8 THP-1 NF- $\kappa$ B::eGFP reporter cells with SARS-CoV-2 *in vitro*-transcribed ssRNA or live SARS-CoV-2.** (A) Novel TLR7 and TLR8 THP-1 NF- $\kappa$ B::eGFP reporter cells were prepared by retroviral transduction of the respective ORFs, followed by sorting of resiquimod-responsive cells. Expression of *TLR7*, *TLR8* and *TLR3* relative to the *EEF1A1* housekeeping gene in wild-type (wt) or TLR7 or TLR8-overexpressing THP-1 NF- $\kappa$ B::eGFP reporter cells was subsequently measured by RT-qPCR (n = 1). (B) Wild-type (wt) or TLR7- or TLR8-overexpressing THP-1 NF- $\kappa$ B::eGFP reporter cells were treated with resiquimod at the indicated concentrations. eGFP expression was measured by flow cytometry after 24 h and representative histograms from one of three independent experiments are shown. (C) eGFP expression from (B), expressed as fold-change of gMFI was used to construct dose-response curves generated with 4-parameter sigmoidal fit with mean  $\pm$  SEM and calculate half maximal effective concentration (EC50; n = 3). (D-E) THP-1 reporter cells were either mock-transfected, or transfected with the 4.5 kb fragment of *in vitro*-transcribed SARS-CoV-2 RNA, and a parallel sample was pretreated with enpatoran (1  $\mu$ M) before SARS-CoV-2 RNA delivery. 24 h later, eGFP expression was measured by flow cytometry (D) and expression of *TNF*, *IL1B*, *IL6* and *CXCL8* mRNA levels were determined using RT-qPCR (E). In (D), representative histograms (left) from one experiment and pooled data (right) from three independent experiments are shown. (F) THP-1 reporter cells were either mock-infected, or infected with SARS-CoV-2 (MOI = 2-3), and a parallel sample was pretreated with enpatoran (1  $\mu$ M) before SARS-CoV-2 infection. After 24 h, cells were fixed and eGFP expression was measured by flow cytometry. Representative histograms (left) from one experiment and pooled data (right) from three independent experiments are shown. (G-H) THP-1 reporter cells were infected as described in (F) and total RNA was isolated 24 hpi. Infection was quantified by measuring SARS-CoV-2 N protein mRNA via RT-qPCR (G) and cell response was determined based on expression of *TNF*, *IL1B*, *IL6* and *CXCL8* mRNA (H), also via RT-qPCR (n = 3 independent experiments). Data in (D-H) are shown as scatter plots with individual values and mean  $\pm$  SEM, and statistical significance was assessed using two-way ANOVA with Tukey's *post-hoc* test.

**A****Alternative receptors of SARS-CoV-2 entry in monocytes**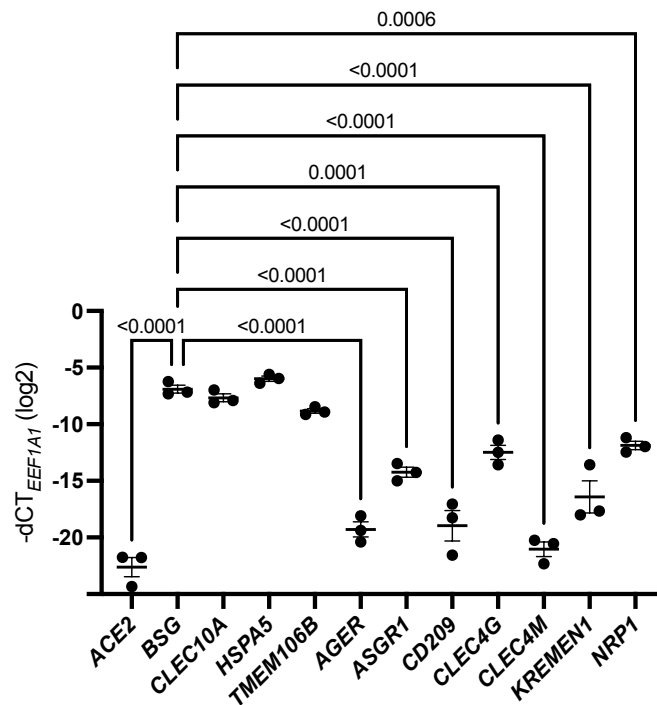**B**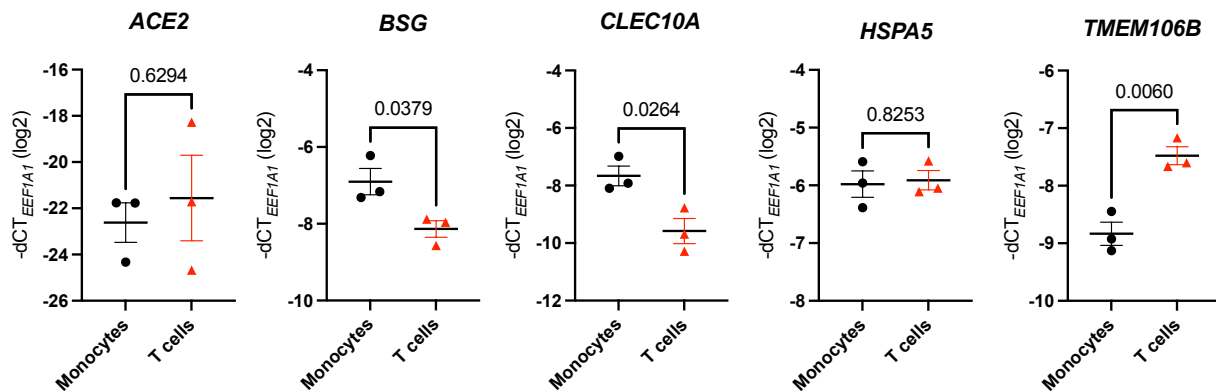

**Figure S5. Expression of *ACE2* and alternative SARS-CoV-2 entry receptors in monocytes and CD4<sup>+</sup> T cells.** (A) Expression of *ACE2* and other proposed alternative SARS-CoV-2 entry receptors relative to the *EEF1A1* housekeeping gene in MACS-sorted human peripheral blood monocytes was determined by RT-qPCR (n = 3). (B) Expression of *ACE2* and the genes encoding highly abundant alternative receptors (*BSG*, *CLEC10A*, *HSPA5* and *TMEM106B*) relative to *EEF1A1* was determined in human peripheral blood monocytes and in autologous CD4<sup>+</sup> T cells by RT-qPCR (n = 3). Data in (A) and (B) are shown as scatter plots with individual values and mean  $\pm$  SEM. In (A), expression of all determined genes was compared to *BSG* expression using one-way ANOVA with Dunnett's *post-hoc* test. In (B), gene expression between monocytes and T cells was statistically evaluated using unpaired t-test (B).



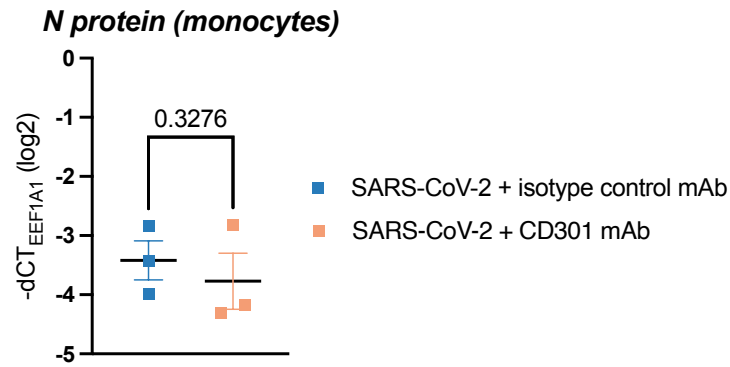

**Figure S6. The CD301 antibody does not block SARS-CoV-2 entry to monocytes.** MACS-sorted human peripheral blood monocytes were pretreated with the CD301 mAb H037G3 or with an isotype control mAb (each at final 20  $\mu\text{g/ml}$ ) and subsequently infected with SARS-CoV-2 at MOI 2. After 24 h, infection was determined by quantification of SARS-CoV-2 N protein mRNA relative to *EEF1A1* mRNA by RT-qPCR ( $n = 3$ ). Results are shown as a scatter plot with individual values and mean  $\pm$  SEM. Data were compared with paired t-test.
